# Supplementary material for: Parent-Reported Otorrhea in Children with Tympanostomy Tubes: Incidence and Predictors
Source: PubMed Central journal article supplement (PMC3709928; doi:10.1371/journal.pone.0069062), 2013-07-12

### Appendix S3

Flowchart of study to determine the incidence of tympanostomy tube otorrhea and its predictors in children

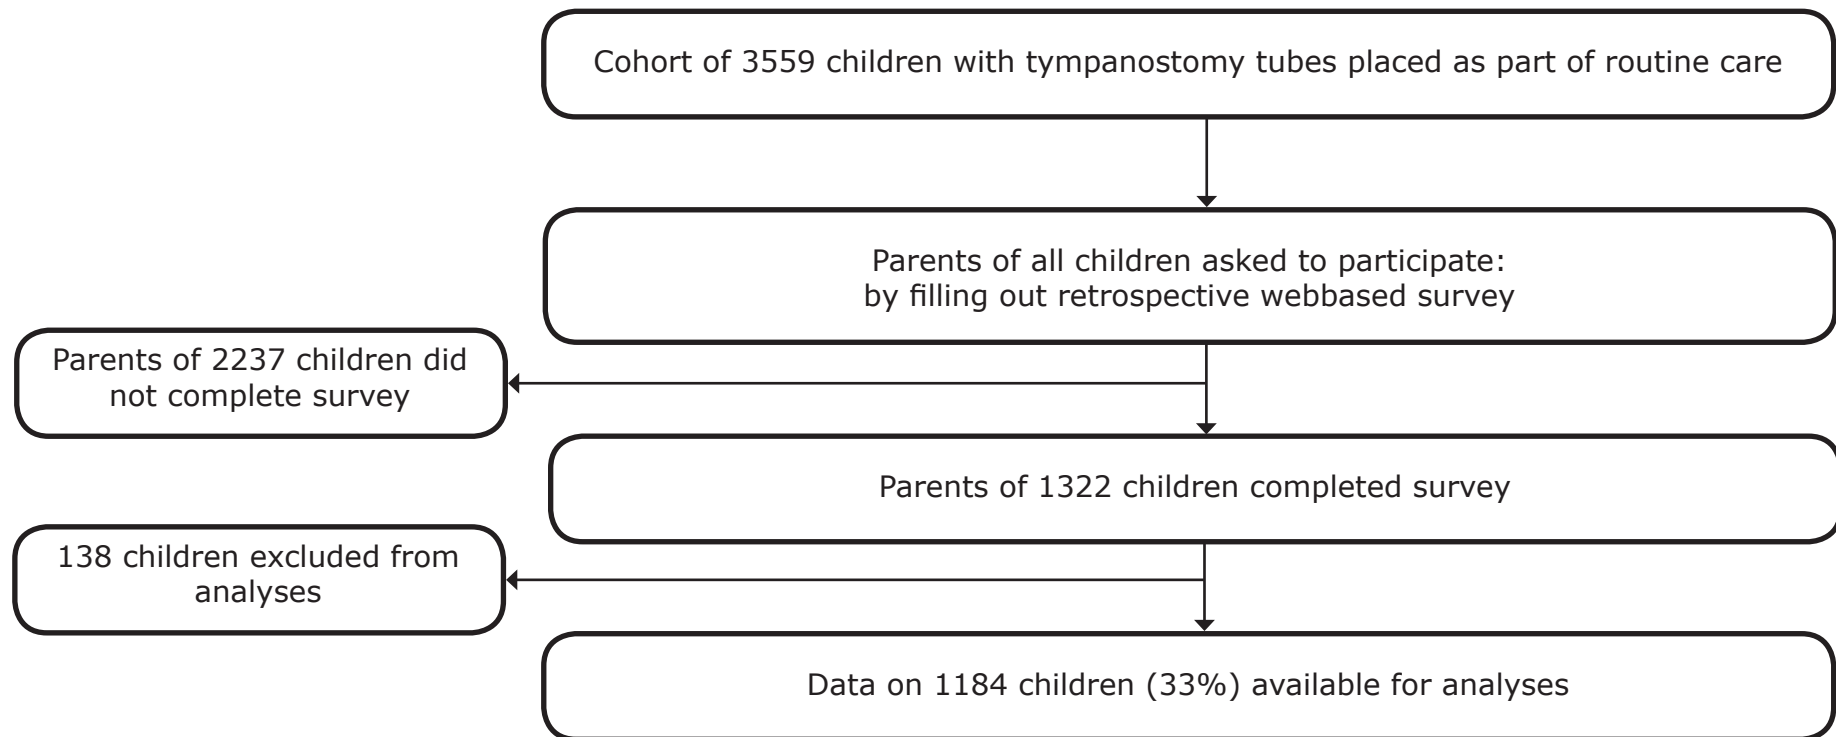

Supplement: pone.0069062.s003.pdf [file pone.0069062.s003.pdf]
